# Supplementary material for: Higher Levels of Plasma Hyaluronic Acid and N-terminal Propeptide of Type III Procollagen Are Associated With Lower Kidney Function in Children With Non-alcoholic Fatty Liver Disease
Source: PubMed Central journal article supplement (PMC9207333; doi:10.3389/fped.2022.917714), 2022-06-06
Supplement: Table_1.pdf [file Table_1.pdf]

**Supplementary Table 1.** Histological characteristics of children with biopsy-confirmed NAFLD.

| <b>n=106</b>                          |                   |
|---------------------------------------|-------------------|
| <b><i>Steatosis grade</i></b>         |                   |
| 0                                     | 0 (%)             |
| 1                                     | 26 (24.5%)        |
| 2                                     | 47 (44.3%)        |
| 3                                     | 33 (31.2%)        |
| <b><i>Lobular inflammation</i></b>    |                   |
| 0                                     | 11 (10.4%)        |
| 1                                     | 72 (67.9%)        |
| 2                                     | 23 (21.7%)        |
| <b><i>Portal inflammation</i></b>     |                   |
| 0                                     | 8 (7.5%)          |
| 1                                     | 76 (71.7%)        |
| 2                                     | 22 (20.8%)        |
| <b><i>Ballooning degeneration</i></b> |                   |
| 0                                     | 17 (16%)          |
| 1                                     | 44 (41.5%)        |
| 2                                     | 45 (42.5%)        |
| <b><i>Fibrosis stage</i></b>          |                   |
| 0                                     | 16 (15.2%)        |
| 1                                     | 69 (65%)          |
| 2                                     | 21 (19.8%)        |
| 3                                     | 0 (0%)            |
| <b>Definite NASH</b>                  | <b>68 (64.1%)</b> |

**Supplementary Table 2.** Clinical and biochemical characteristics of children with biopsy-proven NAFLD, stratified by tertiles of eGFR<sub>Bedside Schwartz</sub>.

| Parameters                                                     | 1 <sup>st</sup> tertile<br>(n=36) | 2 <sup>nd</sup> tertile<br>(n=35) | 3 <sup>rd</sup> tertile<br>(n= 35) | p value          |
|----------------------------------------------------------------|-----------------------------------|-----------------------------------|------------------------------------|------------------|
| Age (years)                                                    | 12.6 ± 3.0                        | 11.3 ± 3.0                        | 11.5 ± 2.4                         | 0.114            |
| Male sex (%)                                                   | 47.2                              | 65.7                              | 51.4                               | 0.271            |
| Weight (kg)                                                    | 67.5 ± 24.3                       | 60.5 ± 19.4                       | 64.2 ± 19.9                        | 0.382            |
| BMI (kg/m <sup>2</sup> )                                       | 28.4 ± 5.2                        | 26.1 ± 4.0                        | 27.2 ± 5.7                         | 0.161            |
| WC (cm)                                                        | 88.5 ± 13.3                       | 83.8 ± 13.6                       | 83.2 ± 15.1                        | 0.219            |
| Systolic blood pressure (mmHg),                                | 116 ± 12                          | 108 ± 14                          | 114 ± 16                           | 0.101            |
| Diastolic blood pressure (mmHg),                               | 60 ± 10                           | 62 ± 11                           | 63 ± 11                            | 0.662            |
| Total cholesterol (mg/dL)                                      | 161 ± 25.4                        | 152 ± 25.9                        | 150 ± 33.4                         | 0.213            |
| LDL-cholesterol (mg/dL)                                        | 104 ± 22.3                        | 99 ± 26.3                         | 93 ± 30.0                          | 0.282            |
| HDL-cholesterol (mg/dL)                                        | 44 ± 10.8                         | 44 ± 7.9                          | 44 ± 9.8                           | 0.997            |
| Triglycerides (mg/dL)                                          | 99 (64-172)                       | 88 (64-110)                       | 70 (52-129)                        | 0.219            |
| Fasting glucose (mg/dL)                                        | 83.0 ± 8.9                        | 82.8 ± 9.5                        | 85.2 ± 15.9                        | 0.652            |
| Fasting insulin (mIU/L)                                        | 15.9 (11.0-26.9)                  | 15.0 (9.6-21.3)                   | 17.0 (10.0-22.2)                   | 0.608            |
| HOMA-IR score                                                  | 3.5 (2.2-5.9)                     | 3.3 (1.9-4.9)                     | 3.7 (2.6-5.3)                      | 0.628            |
| hs-CRP (mg/L)                                                  | 0.11 (0.05-0.25)                  | 0.09 (0.05-0.31)                  | 0.05 (0.05-0.31)                   | 0.709            |
| Blood urea nitrogen (mg/dL)                                    | 14.6 ± 3.3                        | 14.8 ± 2.8                        | 13.6 ± 2.7                         | 0.203            |
| Creatinine (mg/dL)                                             | 0.67 ± 0.11                       | 0.55 ± 0.07                       | 0.46 ± 0.06                        | <b>&lt;0.001</b> |
| eGFR <sub>Bedside Schwartz</sub> (mL/min/1.73 m <sup>2</sup> ) | 94 ± 7                            | 114 ± 5                           | 139 ± 15                           | <b>ND</b>        |
| Proteinuria (mg/24h)                                           | 50 (33-70)                        | 48 (38-56)                        | 50 (37-66)                         | 0.797            |
| Albuminuria (mg/24h)                                           | 4.7 (2.7-10.3)                    | 4.1 (2.7-6.8)                     | 4.2 (3.3-8.9)                      | 0.723            |
| AST (IU/L)                                                     | 26 (24-32)                        | 30 (24-35)                        | 27 (23-32)                         | 0.567            |
| ALT (IU/L)                                                     | 26 (20-34)                        | 32 (21-48)                        | 25 (19-49)                         | 0.750            |
| GGT (IU/L)                                                     | 15 (11-19)                        | 16 (14-23)                        | 14 (11-20)                         | 0.354            |
| PIIINP (ng/mL)                                                 | 8.30 (5.4-12.0)                   | 5.51 (3.8-8.8)                    | 4.61 (2.2-7.4)                     | <b>0.003</b>     |
| HA (ng/mL)                                                     | 73.8 (38.3-179.0)                 | 37.3 (28.4-76.0)                  | 28.0 (21.0-36.4)                   | <b>&lt;0.001</b> |
| Definite NASH* (%)                                             | 41.7                              | 45.7                              | 48.6                               | 0.857            |
| PNPLA3 rs738409                                                |                                   |                                   |                                    | <b>0.030</b>     |
| CC genotype (%)                                                | 11.1                              | 40.0                              | 37.1                               |                  |
| CG genotype (%)                                                | 44.4                              | 28.6                              | 40.0                               |                  |
| GG genotype (%)                                                | 44.4                              | 31.4                              | 22.9                               |                  |

Data are expressed as means ± SD, medians and interquartile ranges (in parenthesis), or percentages.

\*Definite NASH was defined as presence of NAFLD Activity Score [NAS] ≥ 5 on histology.

**Abbreviations:** BMI, body mass index; WC, waist circumference; LDL, low-density lipoprotein; HDL, high-density lipoprotein; HOMA-IR, homeostasis model assessment-insulin resistance; hs-CRP, high-sensitivity C-reactive protein; eGFR, glomerular filtration rate; AST, aspartate aminotransferase; ALT, alanine aminotransferase; GGT, gamma-glutamyltransferase; PIIINP, N-terminal propeptide of type III procollagen; HA, hyaluronic acid; NASH, non-alcoholic steatohepatitis; ND, not determined.

**Supplementary Table 3.** Mann-Whitney U-test comparisons between HA, PIINP, and PNPLA3 genotype and histological features.

|                          | Steatosis |          | Lobular inflammation |          | Portal inflammation |          | Ballooning |          | Fibrosis |          | NAS      |          |
|--------------------------|-----------|----------|----------------------|----------|---------------------|----------|------------|----------|----------|----------|----------|----------|
|                          | <i>z</i>  | <i>p</i> | <i>z</i>             | <i>p</i> | <i>z</i>            | <i>p</i> | <i>z</i>   | <i>p</i> | <i>z</i> | <i>p</i> | <i>z</i> | <i>p</i> |
| <b>HA</b>                | 2.88      | 0.01     | 4.70                 | 0.01     | 5.5                 | 0.012    | 1.91       | 0.11     | 3.11     | 0.02     | -2.78    | 0.002    |
| <b>PIINP</b>             | -5.51     | 0.001    | -2.82                | 0.001    | 5.8                 | 0.001    | -1.79      | 0.08     | 2.88     | 0.001    | 2.67     | 0.001    |
| <b>PNPLA3</b><br>(CG+GG) | 3.26      | 0.01     | -2.23                | 0.024    | -1.4                | 0.16     | -1.51      | 0.09     | 2.01     | 0.044    | -5.52    | 0.001    |

Abbreviations: HA, hyaluronic acid; PIINP, N-terminal propeptide of type III procollagen; NAS, NAFLD activity score.
